1 **TITLE**

2 Left Hemisphere Dominance for Bilateral Kinematic Encoding in the Human Brain

3

4 **AUTHORS:**

5 Christina M. Merrick<sup>1\*</sup>, Tanner C. Dixon<sup>2</sup>, Assaf Breska<sup>1</sup>, Jack J. Lin<sup>3</sup>, Edward F.,  
6 Chang<sup>4</sup>, David King-Stephens<sup>5</sup>, Kenneth D. Laxer<sup>5</sup>, Peter B. Weber<sup>5</sup>, Jose M.  
7 Carmena<sup>2,6,7</sup>, Robert T. Knight<sup>1,2,4,7</sup>, Richard B. Ivry<sup>1,2,7</sup>

8

9 **AFFILIATIONS:**

10 <sup>1</sup> Department of Psychology, University of California, Berkeley, CA, USA

11 <sup>2</sup>UC Berkeley – UCSF Graduate Program in Bioengineering

12 <sup>3</sup>Department of Neurology, University of California at Irvine, Irvine, CA, USA.

13 <sup>4</sup>Department of Neurological Surgery, University of California San Francisco, San  
14 Francisco, CA, USA.

15 <sup>5</sup>Department of Neurology and Neurosurgery, California Pacific Medical Center, San  
16 Francisco, CA, USA.

17 <sup>6</sup>Department of Electrical Engineering and Computer Sciences, University of California,  
18 Berkeley, CA, USA

19 <sup>7</sup>Helen Wills Neuroscience Institute, University of California, Berkeley, CA, USA

20 \*Correspondence: [cmerrick@berkeley.edu](mailto:cmerrick@berkeley.edu)

21

22 **KEYWORDS:** lateralization; left hemisphere; motor control; reaching movements;  
23 ipsilateral; praxis; electrocorticography

24

25

26

27

28

29

30

1 **ABSTRACT**

2 Neurophysiological studies in humans and non-human primates have revealed  
3 movement representations in both the contralateral and ipsilateral hemisphere. Inspired  
4 by clinical observations, we ask if this bilateral representation differs for the left and right  
5 hemispheres. Electrocorticography (ECoG) was recorded in human participants during  
6 an instructed-delay reaching task, with movements produced with either the contralateral  
7 or ipsilateral arm. Using a cross-validated kinematic encoding model, we found stronger  
8 bilateral encoding in the left hemisphere, an effect that was present during preparation  
9 and was amplified during execution. Consistent with this asymmetry, we also observed  
10 better cross-arm generalization in the left hemisphere, indicating similar neural  
11 representations for right and left arm movements. Notably, these left hemisphere  
12 electrodes were largely located over premotor and parietal regions. The more extensive  
13 bilateral encoding in the left hemisphere adds a new perspective to the pervasive  
14 neuropsychological finding that the left hemisphere plays a dominant role in praxis.

15

16

17

18

19

20

21

22

23

24

25

26

27

28

29

30

31

32

33

## 1 INTRODUCTION

2 A primary tenet of neurology is the contralateral organization of movement. The vast  
3 majority of the fibers from the corticospinal tract cross to the opposite side of the body  
4 (Nyberg-Hansen & Rinvik, 1963) and functionally, hemiparesis resulting from cortical  
5 stroke is manifest on the contralateral side of the body (Bourbonnais, & Noven, 1989).  
6 Although direct control of arm movements is primarily mediated through contralateral  
7 projections, unimanual arm movements elicit bilateral activity in the primary motor cortex  
8 (M1, Babiloni et al., 1999; Ghacibeh et al., 2007), indicating that neural activity in the  
9 ipsilateral hemisphere contains information relevant to ongoing movement.  
10 Correspondingly, kinematic and movement parameters of the ipsilateral limb can be  
11 decoded from ipsilateral hemisphere intracortical recordings in monkeys (Ganguly et al.,  
12 2009; Ames & Churchland, 2019) and from electrocorticography (ECoG) in humans  
13 (Bundy, Szrama, Pahwa & Leuthardt, 2018; Ganguly et al., 2009, Wisneski et al., 2008).  
14 Ipsilateral signals represent an intriguing source of neural activity, both for understanding  
15 how activity across the two hemispheres results in coordinated movement and because  
16 this information might be exploited for rehabilitative purposes.

17 While it is established that information about unimanual movements is contained  
18 within the ipsilateral hemisphere, there remains considerable debate about what this  
19 signal represents. Previous studies have centered on the question of whether ipsilateral  
20 representations overlap or are independent of contralateral representations, leading to  
21 mixed results. Consistent with the overlap hypothesis, neural activity for the contralateral  
22 and ipsilateral limb movements show several similarities, including shared target tuning  
23 preferences and the ability to cross predict kinematic features from a model trained on  
24 the opposite arm (Bundy, Szrama, Pahwa & Leuthardt, 2018; Cisek, Crammond &  
25 Kalaska, 2003; Steinberg et al., 2002, Willett et al., 2020). Consistent with the  
26 independence hypothesis, intracortical recordings in monkeys have revealed that the  
27 lower dimensional representations of the two arms lie in orthogonal subspaces (Ames,  
28 Churchland, 2019; Heming, Cross, Takei, Cook & Scott, 2019). These hypotheses are  
29 not mutually exclusive: For example, the degree of overlap or independence may depend  
30 on the gesture type (e.g., overlapping representations for grasping but not arm  
31 movement, Downey et al., 2020), or brain region (e.g., premotor cortex displays stronger  
32 preservation of tuning preferences across the two arms than primary motor cortex, Cisek,  
33 Crammond & Kalaska, 2003).

34 One factor that has received little attention in this literature is the recording  
35 hemisphere. This is surprising given the marked asymmetries between the two  
36 hemispheres in terms of praxis (Corballis, Badzakova-Trajkov & Häberling, 2012; Rothi,  
37 Ochipa & Heilman, 1997). Tracing back to the early 20<sup>th</sup> century, marked hemispheric  
38 asymmetries have been defined by the behavioral deficits observed following unilateral  
39 brain injury (Schaefer, Haaland & Sainburg, 2007; Liepmann 1908, cited in Renzi, &  
40 Lucchelli, 1988). Apraxia, an impairment in the production of coordinated, meaningful  
41 movement in the absence of muscle recruitment deficits, is much more common after left  
42 compared to right hemisphere insult (Haaland, Harrington & Knight, 2000; Renzi, &  
43 Lucchelli, 1988). Moreover, left hemisphere stroke will frequently result in apraxic  
44 symptoms for gestures produced with either hand, as well as impairments in action  
45 comprehension (Renzi, & Lucchelli, 1988). Hemispheric asymmetries are also evident in  
46 neuroimaging activation patterns in healthy participants, with the left hemisphere having  
47 stronger activation during ipsilateral movement than the right hemisphere, especially with  
48 increasing task difficulty (Chettouf et al., 2020, Verstynen et al. 2005; Verstynen and Ivry

1 2011; Schäfer et al, 2007). These patterns raise the possibility that the ipsilateral cortical  
2 representation differs between the left and right hemispheres.

3 In the present study, we use intracranial recordings from the cortical surface (ECoG)  
4 to examine the degree of cortical overlap for ipsilateral and contralateral upper limb  
5 movement in the left and the right hemisphere. The data were collected from six patients,  
6 three with left hemisphere implants and three with right hemisphere implants, while they  
7 engaged in an instructed-delay reaching task. We focus on predicting the temporal  
8 dynamics of high frequency activity (HFA; 70-200Hz), a surrogate for infragranular single-  
9 unit activity and supragranular dendritic potentials, (Leszczynski et al., 2020) which tracks  
10 local activation of the cortex (Muthukumaraswamy, 2010). Going beyond previous studies  
11 that use decoding models which combine multiple neural features from multiple  
12 electrodes to predict kinematics, we employed an encoding model which uses kinematic  
13 features to predict neural activity for each electrode, allowing us to retain the high spatial  
14 and temporal resolution of the ECoG signal. This approach allows us to create high-  
15 resolution topographic maps depicting encoding strength on the surface of the cortex for  
16 movements produced with the contralateral and ipsilateral arm. This is preferable to  
17 projecting the weights obtained from decoding models since these models have difficulty  
18 disambiguating between informative and uninformative electrodes (Kriegeskorte &  
19 Douglas, 2019). Moreover, our approach provides a way to map kinematics to neural  
20 activity in a time-resolved manner (rather than as single weights), allowing us to identify  
21 time ranges of representational overlap and divergence across the two arms for each  
22 electrode.

## 23 RESULTS

24 **Behavior.** Patients made continuous reaches to and from the touchscreen, producing  
25 roughly, bell-shaped velocity profiles for both the outbound and the inbound segments  
26 of our estimated kinematics (Fig 1C,1E). Table 1 summarizes the total number of  
27 successful trials, along with the reaction time and movement time data. A trial was  
28 considered unsuccessful if the reach was initiated before the go cue or if contact with  
29 the touchscreen was outside the boundary of the target. The percentage of  
30 unsuccessful trials was low, ranging between 0% to 12.5% across individuals.  
31 Outbound reaches (platform to touchscreen) were, on average, faster than inbound  
32 reaches (touchscreen to platform) for the majority of patients. Note that the reaction  
33 time data are averaged across left and right arm reaches since there was no consistent  
34 difference on this measure.

| Patient ID | Handedness   | RT         | Outbound reach | Inbound reach | Total trials |
|------------|--------------|------------|----------------|---------------|--------------|
| L1         | Right        | 392 (102)  | 703 (118)      | 907 (287)     | 152          |
| L2         | Right        | 1574 (871) | 598 (173)      | 1003 (406)    | 146          |
| L3         | Ambidextrous | 771 (345)  | 946 (183)      | 1429 (252)    | 148          |
| R1         | Right        | 518 (194)  | 940 (211)      | 1027 (345)    | 132          |
| R2         | Right        | 335 (55)   | 602 (94)       | 590 (120)     | 145          |
| R3         | Right        | 534 (157)  | 721 (145)      | 1017 (318)    | 145          |

35

1 **Table 1. Summary of performance measures for each participant.**

2

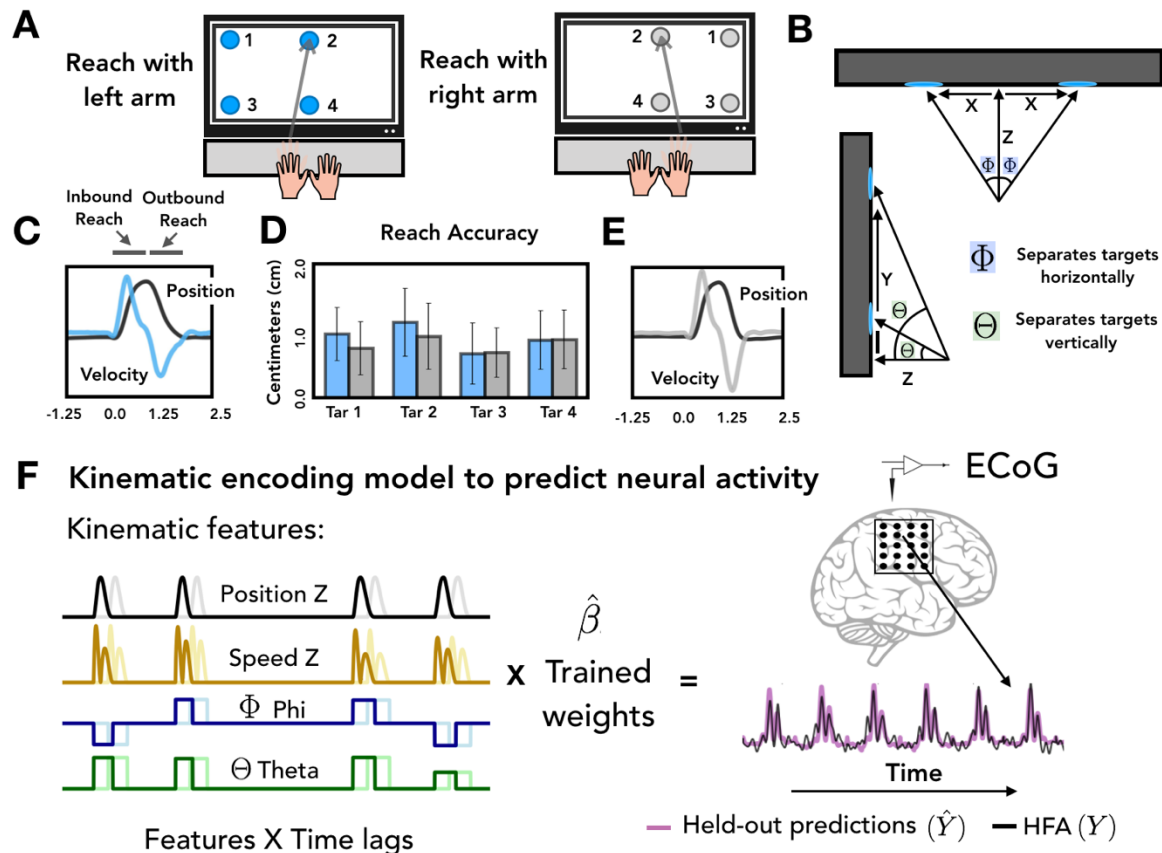

3 **Figure 1. Task and model design. A) Task design.** Patients performed an instructed-delay  
 4 reaching task, moving to targets that appeared on a touchscreen monitor with either the left or  
 5 right arm. **B) Task Schematic.** Target position with respect to the start position of the reaching  
 6 arm can be defined on the basis of three Cartesian coordinates (X, Y, Z) and two spherical  
 7 angles (Theta and Phi). **C) Reaching profile, left.** Average estimated position and velocity  
 8 traces for a representative series of trials performed with the left arm. **D) Reach accuracy.**  
 9 Accuracy was quantified as the absolute distance from the center of each target (target  
 10 diameter = 2.5cm) to the touch location for all four targets with the left (blue) and right (grey)  
 11 arm. **E) Reaching profile, right.** Same as C, but with the right arm. **F) Kinematic encoding**  
 12 **model.** Time lagged estimated kinematic features were used to predict high frequency  
 13 activity (HFA) for each electrode using ridge regression. Four kinematic features were included  
 14 in the model: Position in the Z dimension, speed in the Z dimension and the two spherical  
 15 angles Phi and Theta. Kinematic features were trained on a subset of the HFA data and  
 16 predictions of HFA activity were evaluated with held-out test sets.

17 At a more fine-grained level of spatial accuracy, we calculated the distance from  
 18 the center of each target to the touch location for each trial. On average, the mean  
 19 distance from the center of the 2.5 cm circle was 0.80 cm ( $SD = 0.10$  cm) for right-  
 20 handed reaches and 0.90 cm ( $SD = 0.17$  cm) for left-handed reaches (Fig 1D). These  
 21 values did not differ from one another ( $t = 1.538, p = .222$ ).

22 **Stronger bilateral encoding in the left hemisphere.** We examined the extent to which  
 23 movement kinematics were encoded for contralateral and ipsilateral reaches in  
 24 individual electrodes. To do this we fit a kinematic encoding model that maps  
 25 continuous kinematic features to the HFA signal (Fig 1F) for the 665 electrodes meeting

1 our inclusion criteria. This procedure was done separately for contralateral and  
 2 ipsilateral reaches. We quantified the cross-validated model fit by generating HFA  
 3 predictions using the kinematic features from held-out trials of the same condition and  
 4 calculating prediction performance as the square of the linear correlation ( $R^2$ ) between  
 5 the predicted and actual HFA signal (Fig 2B).

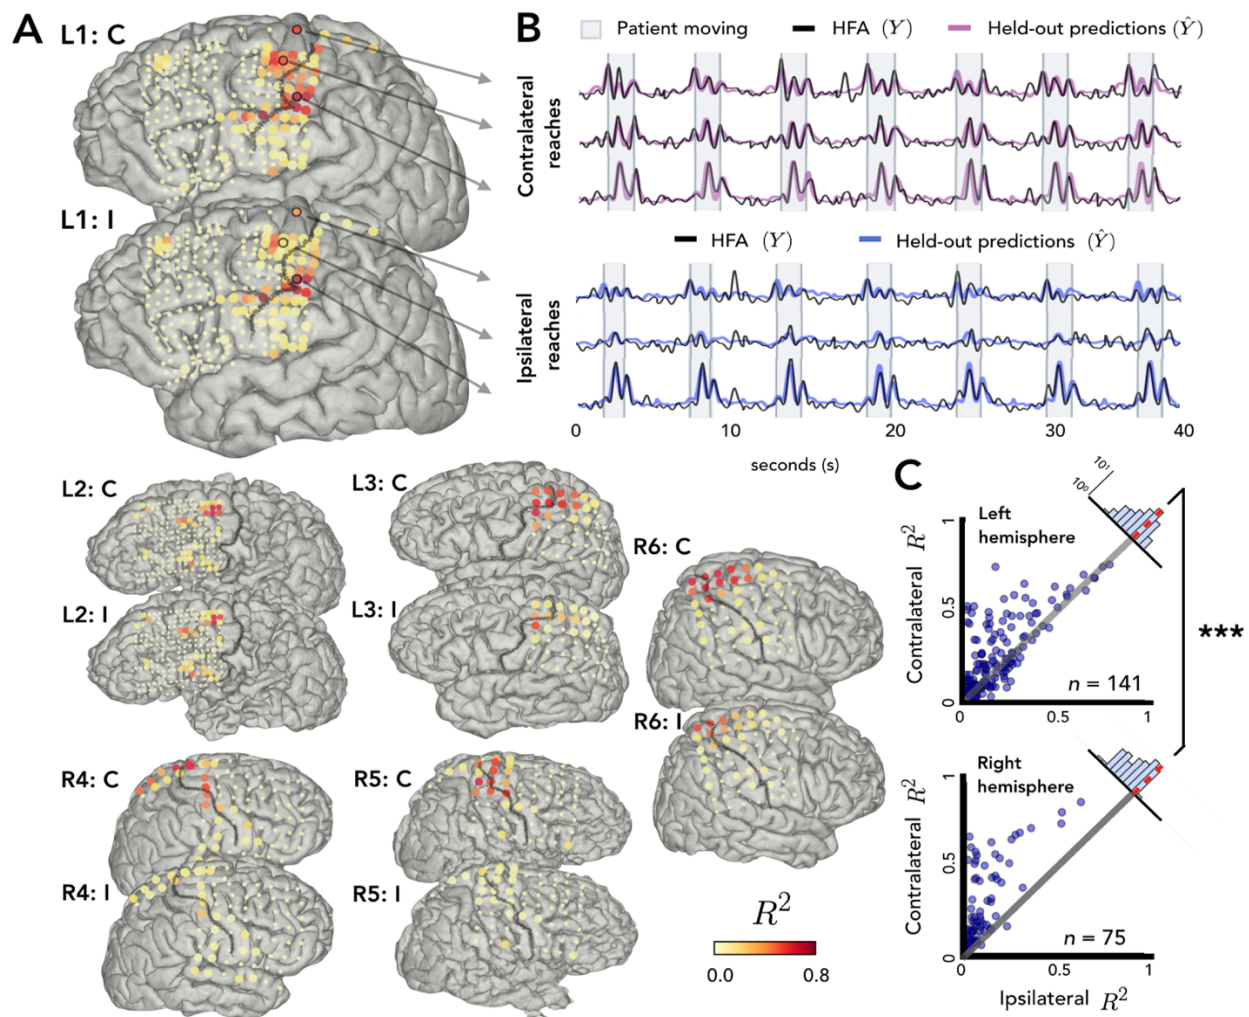

6

7 **Figure 2. Stronger bilateral encoding in left hemisphere.** Held-out prediction performance  
 8 ( $R^2$ ) was computed for each electrode during contralateral reaches (C) and ipsilateral reaches  
 9 (I).  $R^2$  was calculated as the squared linear correlation between the actual HFA and the  
 10 predictions based on the model. **A) Prediction performance maps for individual patients.**  
 11 Performance of each electrode, shown at the idiosyncratic electrode location for each  
 12 participant (location based on clinical criteria). Electrodes that did not account for at least .05%  
 13 of the variance ( $R^2 < .05$ ) in either the contralateral or ipsilateral condition are shown as smaller  
 14 dots. **B) Model predictions.** Representative time series of the actual HFA and model-based  
 15 predictions for three electrodes during contralateral and ipsilateral reaches. **C) Summary**  
 16 **across patients.** Scatter plot displaying  $R^2$  values separately for patients with electrodes in  
 17 either the left (upper) or right (lower) hemisphere.  $R^2$  for contralateral predictions are plotted  
 18 against  $R^2$  for ipsilateral predictions. Electrodes close to the unity line encode both arms equally  
 19 whereas electrodes off the unity line indicate stronger encoding of one arm. Points above the  
 20 unity line indicate stronger encoding of the contralateral arm. These differences are  
 21 summarized in the frequency histograms in the upper right of each panel. The histogram shows  
 22 less of a shift in the left hemisphere, a signature consistent with stronger bilateral encoding.  
 23 \* $p < 0.05$ , \*\* $p < 0.01$ , \*\*\* $p < 0.001$ , permutation test.

1           Figure 2A displays  $R^2$  values for each electrode for the contralateral and  
2 ipsilateral condition, presented on the individual patient MRIs. Electrodes with high  
3 prediction performance were primarily located in arm areas of sensorimotor cortex. In  
4 line with previous research (Downey et al., 2020), a sizeable percentage of the  
5 electrodes were able to predict the HFA at or above our criterion of  $R^2 > .05$  (examples  
6 shown in Figure 2B). This degree of prediction was observed not only when the data  
7 were restricted to contralateral movement (31% of electrodes), but also when the data  
8 were from ipsilateral movement (25%). A number of electrodes (24%) were predictive in  
9 both the contralateral and ipsilateral models. Electrodes that did not meet this criterion  
10 for either arm are represented as small dots in figure 2A and were excluded from further  
11 analysis, leaving a total of 216 predictive electrodes (32%, 141 = left hemisphere, 75 =  
12 right hemisphere).

13           We next asked whether prediction was stronger for contralateral movement, and  
14 whether this varied between the two hemispheres. Figure 2C compares the predictive  
15 performance for each electrode for the contralateral and ipsilateral conditions. Values  
16 close to the unity line yield similar predictions for the conditions; values off the unity line  
17 indicate that encoding is stronger for one arm compared to the other. To compare  
18 prediction performance at the group level, distributions were created by taking the  
19 difference between the  $R^2$  values for the contralateral and ipsilateral conditions for each  
20 electrode (Figure 2C, upper right corner of each scatterplot). As can be seen, there is a  
21 pronounced contralateral bias for both hemispheres (one sample t-test against zero:  
22  $\Delta R^2_{\text{left}} = 0.024$ ,  $p_{\text{left}} < .001$ ,  $\Delta R^2_{\text{right}} = 0.115$ ,  $p_{\text{right}} < .001$ ). Importantly, the contralateral  
23 bias was attenuated in the left hemisphere compared to the right hemisphere  
24 (permutation test,  $p < .001$ ), indicating stronger bilateral encoding in the left hemisphere.  
25 In addition to the hemisphere effect, we also found that the contralateral bias becomes  
26 weaker the further the electrodes are from putative primary motor cortex in both  
27 hemispheres ( $r_{\text{left}} = -0.48$ ,  $p_{\text{left}} < .001$ ,  $r_{\text{right}} = -0.45$ ,  $p_{\text{right}} < .001$ ; Fig S2).

28           **Opposing patterns of kinematic encoding for the left and right hemisphere during**  
29 **planning and execution.** As neural activity unfolds from preparation to movement, the  
30 underlying computations may change substantially (Elsayed et al., 2016). To examine if  
31 hemispheric asymmetries in encoding depend on task state, we repeated the analysis  
32 described in the previous section, but now separated the data to test the held-out  
33 predictions during the instruction and movement phases (Fig 3A). We used a mixed  
34 design permutation test to examine the effect of hemisphere and task phase on our  
35 measure of contralateral bias (Fig 3B).

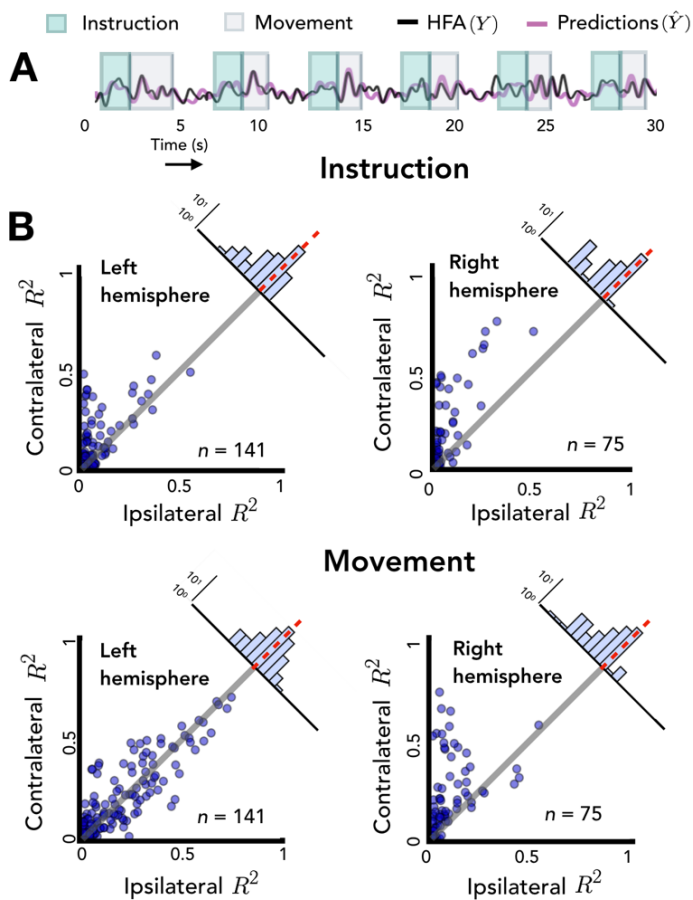

### Figure 3. Opposing encoding patterns for left and right hemisphere across task phase.

For all predictive electrodes the time series was segmented into instruction and movement epochs.  $R^2$  was then calculated separately for each epoch. **A) Example model predictions.** Time series of a representative electrode with boxes surrounding the instruction (teal) and movement epochs (grey). **B) Prediction performance during movement and instruction.** Comparison of  $R^2$  values for contralateral and ipsilateral predictions during the instruction epoch (top) and the movement epoch (bottom) for patients with electrodes in the left hemisphere (left) or right (right) hemisphere. Bilateral encoding was stronger in the left hemisphere, an effect that was especially pronounced during the movement phase.

27 As in the previous analysis, the effect of hemisphere was significant, with stronger  
 28 bilateral encoding (i.e., smaller difference score) in the left hemisphere compared to the  
 29 right hemisphere ( $p < .001$ ). The effect of task phase was not significant, but there was  
 30 a significant interaction between hemisphere and task phase ( $p < .005$ ): There was a  
 31 larger difference between the two hemispheres during the movement phase compared  
 32 to the instruction phase. Analyzing simple effects within each hemisphere, we found  
 33 that encoding in the left hemisphere was more bilateral during movement compared to  
 34 instruction ( $\Delta R^2_{\text{left\_move}} = 0.006$ ,  $\Delta R^2_{\text{left\_instruction}} = 0.042$ ,  $p < .001$ ). In contrast, the opposite  
 35 pattern was observed in the right hemisphere, with encoding being more bilateral  
 36 during the instruction phase ( $\Delta R^2_{\text{right\_move}} = 0.127$ ,  $\Delta R^2_{\text{right\_instruction}} = 0.103$ ,  $p < .001$ ). The  
 37 contralateral bias was most attenuated in the left hemisphere during the movement  
 38 condition, with a mean difference score that was not statistically different from zero  
 39 ( $p_{\text{left\_move}} = .482$ ). For the left hemisphere instruction phase and both phases for the  
 40 right hemisphere, the contralateral bias was significant ( $p_{\text{left\_instruction}} < .001$ ,  $p_{\text{right\_move}} <$   
 41  $.001$ ,  $p_{\text{right\_instruction}} < .001$ ). These results suggest that the left and right hemisphere may  
 42 have different roles in bilateral encoding with regard to task phase. In particular, the  
 43 contralateral bias disappears in the left hemisphere during movement indicating that  
 44 prediction performance was not different for movements produced with either the  
 45 contralateral or ipsilateral arm.

### 46 Across arm generalization: More overlap between arms in the left hemisphere.

47 The preceding analyses focused on an encoding analysis for within-arm prediction. We  
 48 next evaluate the overlap between the neural representations for contralateral and  
 49 ipsilateral movement. To this end, we examined across-arm prediction performance by



- 1 training the kinematic encoding model with the data from movements produced with one
- 2 arm and testing prediction performance using the data from movements produced with
- 3 the other arm.

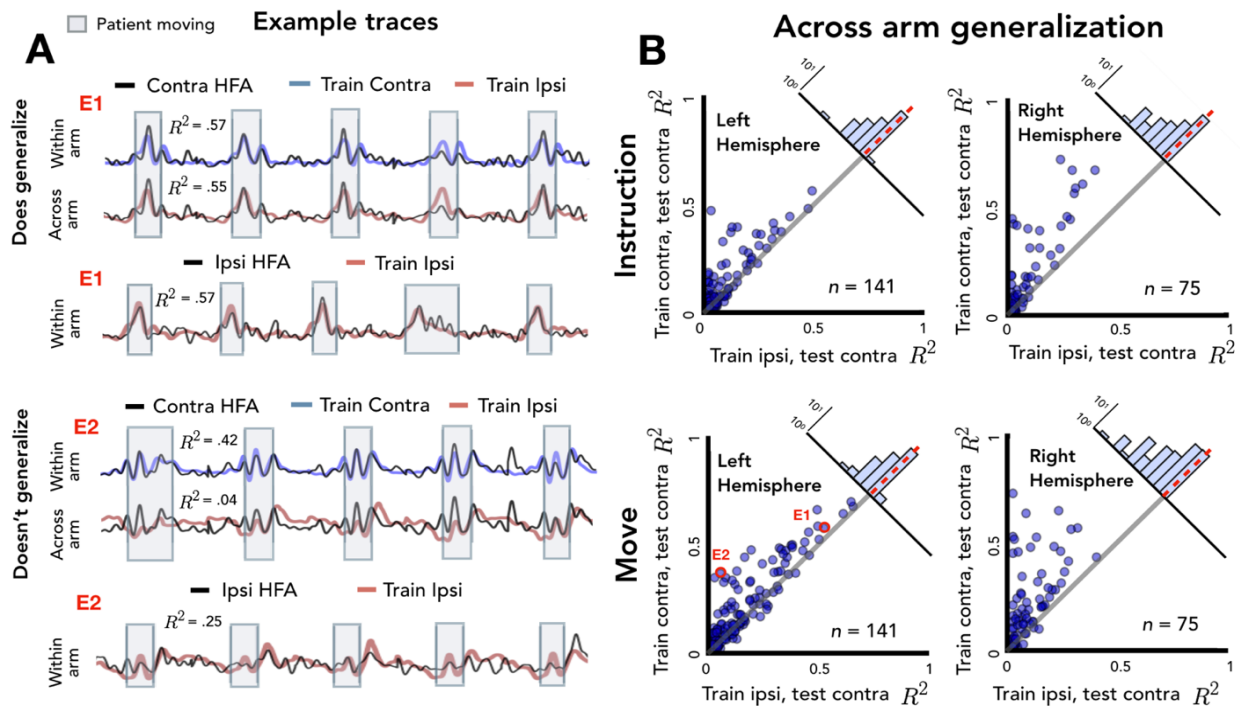

4

5 **Figure 4. Stronger across-arm generalization in the left hemisphere.** Across-arm  
6 predictions were created by training the model on ipsilateral reaches and using the trained  
7 weights to predict HFA during contralateral reaches. (Within-arm predictions generated the  
8 same as in Figs 2 and 3.) Electrodes close to the unity line have overlapping neural  
9 representations across the two arms whereas electrodes off the unity line indicate that the two  
10 arms are being encoded differentially. **A) Model Predictions.** Predicted and actual HFA for two  
11 electrodes selected from the distribution of left-hemisphere electrodes during movement, one  
12 that generalizes well across arms (E1) and one that fails to generalize (E2). Bottom row shows  
13 within-arm performance for ipsilateral trials, demonstrating that the failure to generalize  
14 across arms does not necessarily indicate poor ipsilateral performance. **B) Across-arm generalization**  
15 **across patients.**  $R^2$  for within-arm predictions plotted against  $R^2$  for across-arm predictions,  
16 with the analysis performed separately for the instruction and movement phases. Left  
17 hemisphere electrodes showed better generalization than right hemisphere electrodes, an effect  
18 that was magnified in the movement phase.

19 Figure 4A shows the traces for two representative electrodes, one that shows  
20 good generalization across the two arms and the other that shows poor generalization.  
21 For the electrode that shows good generalization (E1), prediction performance for held-  
22 out contralateral reaches is comparable when the model is trained on data from either  
23 the contralateral or ipsilateral arm. This suggests that there is overlap between the  
24 neural representations for reaches performed with either upper limb for this electrode. In  
25 contrast, the electrode showing poor generalization (E2) showed good prediction for  
26 contralateral reaches when trained with contralateral data, but poor prediction when  
27 trained with ipsilateral data. Here the neural representations for the arms do not overlap.  
28 Note that E2 showed relatively strong within-arm ipsilateral encoding ( $R^2 = .25$ ); thus,  
29 the inability of this electrode to generalize across arms is not a result of poor encoding  
30 of the ipsilateral arm. Rather, E2 encodes movement produced by either arm, but the  
31 manner in which they are encoded differs.

1 Figure 4B summarizes the comparison of within-arm prediction (y axis) against  
2 across-arm prediction (x axis), with the data separated for the instruction and  
3 movement phases. In this depiction, electrodes close to the unity line have overlapping  
4 neural representations during contra- and ipsilateral movement, whereas electrodes off  
5 the unity line encode the two arms differentially. We again used a mixed design  
6 permutation test, now applied to the difference between within-arm  $R^2$  and across-arm  
7  $R^2$  for each electrode (Figure 4B, upper right corner of each scatterplot). Overall, the  
8 left hemisphere showed stronger between-arm generalization than the right  
9 hemisphere (main effect of hemisphere:  $\Delta R^2_{\text{left}} = 0.041$ ,  $\Delta R^2_{\text{right}} = 0.108$ ;  $p < .001$ ). This  
10 indicates that the left hemisphere not only has stronger bilateral encoding (Figure 3B)  
11 but also has more similar neural representations across the two upper limbs. We also  
12 found a main effect of task phase, with better across-arm generalization occurring  
13 during instruction compared to movement (main effect of task phase:  $\Delta R^2_{\text{instruction}} =$   
14  $0.050$ ,  $\Delta R^2_{\text{movement}} = 0.079$ ;  $p < .001$ ).

15 In addition to these main effects, there was also a significant interaction  
16 between task phase and hemisphere ( $p < .05$ ). Analyzing simple effects within each  
17 task phase, the left hemisphere had better across-arm generalization for both the  
18 instruction and movement phase (simple effect analysis:  $p_{\text{instruct}} < .001$ ,  $p_{\text{move}} < .001$ ). In  
19 addition, better across-arm generalization was found during the instruction phase in  
20 both the left and the right hemispheres (simple effect analysis:  $p_{\text{left}} < .001$ ,  $p_{\text{right}} < .001$ ).  
21 The significant interaction indicates that while the neural representations across arms  
22 became more distinct in both hemispheres with the transition from instruction to  
23 movement, this difference was more pronounced in the right hemisphere. In sum,  
24 electrodes in the left hemisphere generalize across-arms better during instruction and  
25 movement compared to the right hemisphere and electrodes in the left hemisphere  
26 also change less during the transition from instruction to movement compared to the  
27 right hemisphere.

28 **Temporal and spatial topography of across-arm generalization.** To examine how  
29 generalization varied across the cortex, we categorized each electrode as showing  
30 either good across-arm generalization (decrease of up to 20% relative to within-arm  
31 performance) or poor across-arm generalization (decrease of more than 50%; Fig 5A).  
32 We focused on the extremes of the generalization distribution based on the assumption  
33 that these electrodes were more likely to share similar underlying neural profiles. This  
34 also allowed us to have similar numbers of electrodes in each group.

35 As can be seen in Figure 5B, electrodes that generalize well were predominantly  
36 found in the left hemisphere (white circles). In contrast, electrodes showing poor  
37 generalization are observed in both hemispheres (magenta circles). Moreover, in both  
38 hemispheres, electrodes showing poor generalization were clustered near the dorsal  
39 portion of the central sulcus, a region corresponding to the arm area of motor cortex.  
40 Electrodes showing strong generalization (mostly limited to the left hemisphere) tended  
41 to be in dorsal and ventral premotor cortices, along with a few in dorsal parietal lobe.  
42 This pattern was also observed when we analyzed all electrodes, rather than restrict the  
43 analysis to those showing extreme values. Here we used continuous measures,  
44 correlating the amount of across-arm generalization with the distance (absolute value)  
45 from the dorsal aspect of the central sulcus. The correlation was significant in the left  
46 hemisphere ( $r_{\text{left}} = 0.463$ ,  $p_{\text{left}} < .001$ ) but did not reach significance in the right

1 hemisphere, although the trend was in the same direction ( $r_{\text{right}} = 0.224$ ,  $p_{\text{right}} = .068$ ; Fig  
 2 S2).

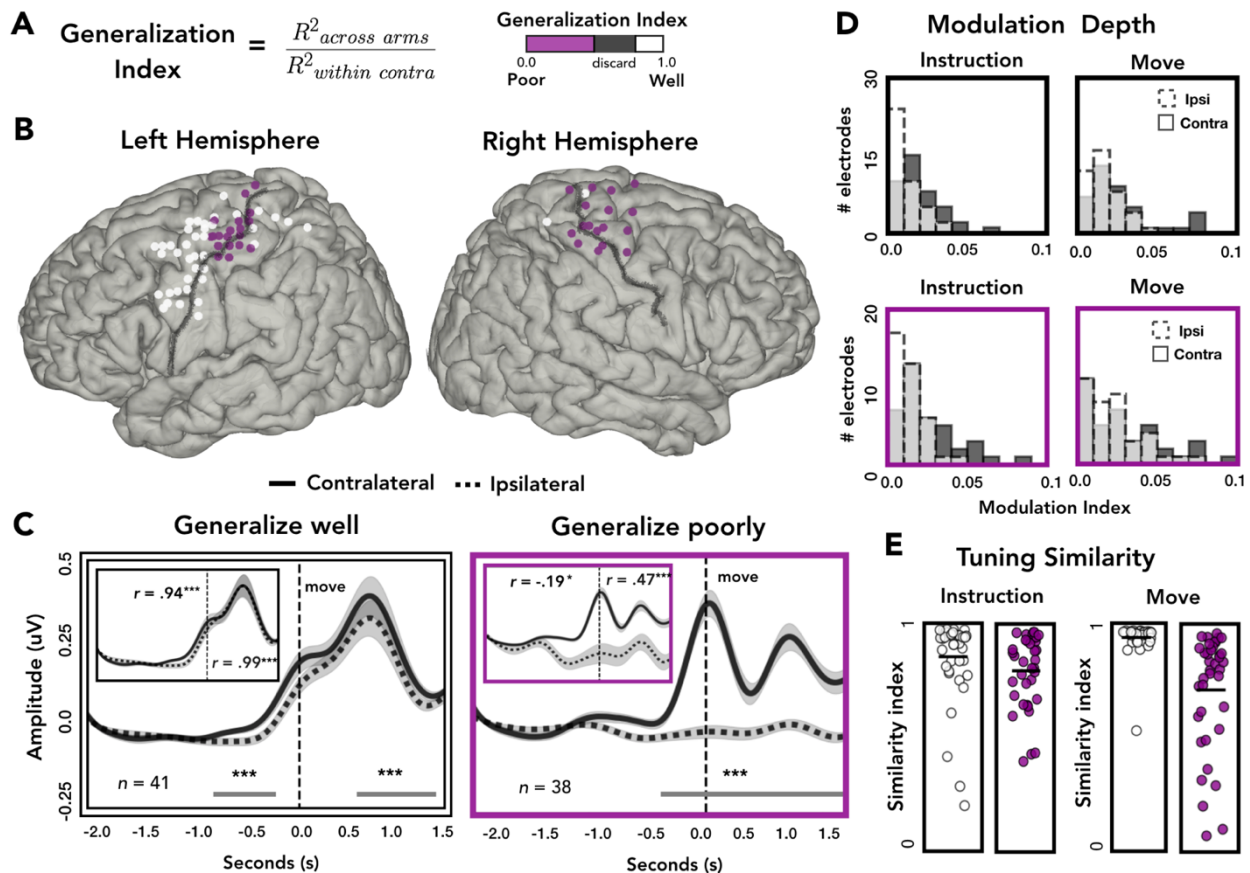

3  
 4 **Figure 5. Spatial and temporal relationship of across-arm generalization. A)**

5 **Generalization index.** Electrodes were classified as showing good across-arm generalization  
 6 (white, generalization index > .80) or poor across arm generalization (magenta; generalization  
 7 index < .50). **B) Spatial distribution of across-arm generalization.** Electrodes that generalize  
 8 well across arms (white) were primarily located in dorsal and ventral premotor regions of the left  
 9 hemisphere. Electrodes that generalize poorly (magenta) were clustered around the putative  
 10 arm area of the central sulcus in both the left and right hemispheres. **C) Amplitude differences**  
 11 **across arms.** Average contralateral (solid line) and ipsilateral (dashed line) predictions for  
 12 electrodes that generalize well across arms (left) or generalize poorly (right). Significant clusters  
 13 are represented with a gray line. Inset: Same data but standardized to highlight shape of the  
 14 timeseries independent of absolute amplitude. **D) Modulation depth.** Depth of tuning was  
 15 calculated during instruction or movement with either the ipsilateral or contralateral hand.  
 16 Greater modulation was found during contralateral reaches and during movement. **E) Tuning**  
 17 **similarity.** Across arms tuning similarity was calculated for electrodes that generalize well  
 18 (white) or poorly (magenta). Electrodes that generalize well across arms had significantly more  
 19 tuning similarity than electrodes that did not generalize. \* $p < 0.05$ , \*\* $p < 0.01$ , \*\*\* $p < 0.001$ , cluster  
 20 permutation test, Pearson's correlation.

21 To examine the dynamics of representational overlap and divergence, we  
 22 averaged the time-resolved HFA amplitude across electrodes, restricted to those  
 23 included in the categorical analysis. Figure 5C displays the average time series for  
 24 contralateral (solid line) and ipsilateral (dashed line) predictions for electrodes that  
 25 generalize well (white) or poorly (magenta). The temporal profile of HFA activity is  
 26 similar for electrodes that generalize well, showing a single peak in the movement  
 27 phase. A cluster-based permutation test identified two periods where the HFA amplitude

1 differed for contralateral and ipsilateral reaches, one during instruction and one well into  
2 the movement period. In contrast, the temporal profiles are radically different for those  
3 that generalize poorly, primarily because of the weak modulation during ipsilateral  
4 reaches. Interestingly, these electrodes also showed a double-peaked temporal profile  
5 during contralateral reaches. Similar multi-phasic activity has been observed in single  
6 unit activity in M1 during reaching (Churchland et al., 2012).

7 It is possible that similarity in temporal structure is obscured in the preceding  
8 analysis by the differences in HFA amplitude for the electrodes that showed poor  
9 generalization. To control for this, we standardized the time series data by dividing  
10 each sample by the overall standard deviation (Insets: Fig 5C). Using the standardized  
11 traces, we calculated the linear correlation coefficient between the contralateral and  
12 ipsilateral traces, separately for instruction and movement. As expected, electrodes that  
13 generalized well across arms showed strong across-arm correlations for both task  
14 phases (Inset Fig 5C, *left*). In contrast, for electrodes that generalize poorly across  
15 arms, the correlation between arms was negative during instruction and then rose to a  
16 moderate positive correlation during movement (Inset Fig 5C, *right*). Thus, the poor  
17 generalization of these electrodes is generally due to the temporal divergence of the two  
18 arms during instruction, where the ipsilateral trace becomes inhibited compared to the  
19 contralateral trace. Interestingly, although the ipsilateral trace remains inhibited during  
20 movement, the temporal structure between the two arms re-emerges.

21 **Target modulation and tuning similarity across arms.** To examine the extent of  
22 target modulation for the contralateral and ipsilateral arm, we calculated the modulation  
23 depth of each electrode during the instruction and movement phases. The modulation  
24 index reflects the amount of variability in the signal captured by target tuning (or target  
25 specificity): A modulation index of .1 means 10% of the variance is captured by the  
26 difference between the response to the four target locations. The modulation values  
27 overall were relatively low (Fig 5D). However, it should be noted that the reaches were  
28 all within the fronto-parallel plane which comprise a considerably smaller range of  
29 movement compared to studies that use a center-out reaching task. For both electrode  
30 types (showing good or poor across arm generalization), there was a main effect of arm,  
31 with ipsilateral modulation lower than contralateral modulation ( $p_{Generalize\_well} < .001$ ;  
32  $p_{Generalize\_poorly} < .005$ ). Both subgroups of electrodes also displayed a main effect of task  
33 phase, with the depth of modulation greater during the movement phase compared to  
34 the instruction phase ( $p_{Generalize\_well} < .001$ ;  $p_{Generalize\_poorly} < .005$ ). No significant  
35 interactions were found for either group.

36 We also examined the representational overlap between the two arms in terms of  
37 their tuning profiles. We computed a tuning similarity index, defined as the sum of  
38 squared errors for average HFA predictions to the same target between the  
39 contralateral and ipsilateral arms. A similarity index of 1 would correspond to identical  
40 tuning preferences for the arms whereas a similarity index of 0 would indicate  
41 completely disparate tuning preferences. The similarity data were analyzed with a  
42 mixed design permutation test, including the factors task phase and electrode type  
43 (good vs. poor generalizers). Electrodes that generalize well across the two arms  
44 (predominately found in the left hemisphere) showed more overlap of tuning  
45 preferences compared to electrodes that generalized poorly (main effect of  
46 generalizability:  $p < .001$ ). While there was no effect of phase ( $p = .758$ ), the interaction  
47 was significant ( $p < .005$ ), with electrode types showing more comparable tuning  
48 similarity during instruction and tuning similarity diverging during movement. Simple

1 effects analysis revealed that for electrodes that generalize poorly, tuning similarity was  
2 higher during the instruction phase compared to the movement phase ( $p < .001$ ). In  
3 contrast, for electrodes that generalize well, tuning similarity was higher during  
4 movement compared to instruction ( $p < .001$ ). These analyses demonstrate that a  
5 number of electrodes in the left hemisphere strongly encode kinematic variables for  
6 both arms, including similar tuning preferences across the two arms, which was  
7 especially pronounced during the movement phase.

## 8 **DISCUSSION**

9 Although the most prominent feature of cortical motor pathways is their contralateral  
10 organization, unimanual movements are well represented in the ipsilateral hemisphere.  
11 Single-unit activity and local field potentials obtained from motor cortex in non-human  
12 primates (Ganguly et al., 2009; Ames & Churchland, 2019), as well as ECoG activity in  
13 humans (Bundy, Szrama, Pahwa & Leuthardt, 2018; Ganguly et al., 2009, Wisneski et  
14 al., 2008) can be decoded to predict complex kinematic variables and EMG activity  
15 during arm movements of the ipsilateral arm. Here we extend this work by building a  
16 kinematic encoding model to examine how these features are represented in each  
17 hemisphere. We opted to build an electrode-wise encoding model which opened up new  
18 avenues for analysis. Electrode-wise encoding models allow prediction of the full time  
19 series for each electrode thus retaining the high spatial and temporal resolution of the  
20 intracranial signal. From these metrics we could compare kinematic encoding and  
21 across-arm generalization between the two hemispheres as well as the spatial  
22 distribution of the information-carrying electrodes within each hemisphere. We observed  
23 a marked hemispheric asymmetry: While contralateral movements were encoded  
24 similarly across the two hemispheres, ipsilateral encoding was much stronger in the left  
25 hemisphere, an effect that was especially pronounced during movement execution. In  
26 addition, there was greater overlap between the representation of contra- and ipsilateral  
27 movement in the left hemisphere compared to the right hemisphere.

28 **Hemispheric asymmetry in movement encoding.** We observed a striking asymmetry  
29 between the two hemispheres for ipsilateral movement encoding, with stronger bilateral  
30 encoding of the upper limbs in the left hemisphere compared to the right hemisphere.  
31 The effect size is quite substantial ( $d = 1.34$ ), which exceeds Cohen's (1988) convention  
32 for a large effect ( $d = .80$ ). We studied three patients per hemisphere, with each patient  
33 having at least 17 predictive electrodes, totaling 141 electrodes in the left hemisphere  
34 and 75 in the right hemisphere.

35 Given the size of the hemispheric asymmetry effect, it is surprising that this  
36 asymmetry has not been described in previous reports. This may in part reflect the smaller  
37 sample size in these studies. For example, in Bundy et al. (2018), three of the four  
38 patients had left hemisphere grids, leaving a hemisphere analysis dependent on the  
39 data from a single right hemisphere patient. Studies with non-human primates tend to  
40 ignore hemispheric differences, perhaps because these animals do not show consistent  
41 patterns of hand-dominance across individuals. One exception here is a study by Cisek,  
42 Crammond and Kalaska (2003) who reported no hemispheric differences in neural  
43 recordings obtained from M1 and PMd during ipsilateral and contralateral arm reaches.

44 In addition to examining hemispheric differences in the encoding of unimanual  
45 movement, we also asked if kinematic features were encoded differently for contra- and  
46 ipsilateral movements by testing across-arm generalization. We categorized electrodes

1 as showing either good across-arm generalization (decrease of up to 20% relative to  
2 within-arm performance) or poor across-arm generalization (decrease of more than  
3 50%). This categorization scheme revealed a striking anatomical division, with  
4 electrodes showing good across-arm generalization clustering in the left premotor and  
5 parietal cortices and electrodes that generalized poorly clustering in left and right M1.  
6 Using the same categorization, we further examined the spatial tuning of the electrodes.  
7 Target tuning in the HFA band was found for both contralateral and ipsilateral  
8 movement, although ipsilateral tuning was significantly shallower. Interestingly,  
9 electrodes that generalized well across-arms had similar target tuning for each arm.  
10 This suggests that for these electrodes, ipsilateral signals are not just encoding generic  
11 movement, but encoding movement direction in a similar manner to contralateral  
12 signals. A similar overlap in tuning has been observed in single unit recordings from  
13 PMd (Cisek, Crammond & Kalaska, 2003) and can be inferred from the across-arm  
14 generalization decoding results reported by Bundy et al., (2018). In contrast, electrodes  
15 that failed to generalize, located primarily in M1 in either left or right hemisphere,  
16 exhibited disparate tuning for contra- and ipsilateral reaches.

17 One limitation of our study is that, because two of the left hemisphere patients  
18 had high density grid implants, there were fewer right hemisphere electrodes compared  
19 to the left hemisphere electrodes. However, all three right hemisphere patients had  
20 coverage over dorsal and ventral premotor cortices, making it unlikely that the poor  
21 across-arm generalization for right hemisphere electrodes is due to insufficient  
22 coverage.

23 **Functional implications of hemispheric asymmetries in movement encoding.** By  
24 using a delayed response task, we were able to segregate activity into a instruction  
25 phase during which the patient was presented with the target location for the  
26 forthcoming movement and a movement phase, defined at the onset of the reach. With  
27 this design, we found that the encoding model could predict neural activity during the  
28 instruction phase based on the kinematics of the forthcoming reach, evidence that the  
29 patients were indeed planning the upcoming movement.

30 This task phase analysis also revealed robust asymmetries between the two  
31 hemispheres. There was a main effect of hemisphere, with the left hemisphere  
32 displaying stronger bilateral encoding overall compared to the right hemisphere.  
33 However, there was also an interaction: In the left hemisphere bilateral encoding was  
34 stronger during the movement phase whereas in the right hemisphere bilateral encoding  
35 was stronger during the instruction phase. Surprisingly, in the left hemisphere the  
36 contralateral bias completely disappeared during the movement phase, with both the  
37 contra- and ipsilateral arms being encoded to the same extent. Stronger bilateral  
38 encoding during movement (compared to instruction) is surprising given the spatial  
39 distribution of electrodes that encode ipsilateral movement were primarily outside of M1,  
40 regions typically associated more with planning than execution (e.g., premotor cortices,  
41 parietal cortex).

42 The asymmetry observed here is in accord with the long-standing recognition of  
43 hemispheric asymmetries in praxis. Starting with the classic observations of Liepmann  
44 at the turn of the 20<sup>th</sup> century on the association of the left hemisphere and apraxia  
45 (Liepmann 1908, cited in Renzi, & Lucchelli, 1988; see also Schaefer et al., 2007) and  
46 continuing with functional imaging studies in neurotypical populations, a large body of  
47 evidence points to a dominant role for the left hemisphere in skilled movement often

1 engaging bi-manual movements (Corballis, Badzakova-Trajkov & Häberling, 2012;  
2 Przybylski & Króliczak, 2017). This asymmetry is most pronounced in tasks involving  
3 functional object use (Buxbaum et al., 2006), symbolic gestures (Xu, Gannon,  
4 Emmorey, Smith & Bruan, 2009) and intransitive pantomimes (Bohlhalter et al., 2009).  
5 Apraxia, following left-hemisphere damage can be manifest in movements produced  
6 with either limb (Renzi, & Lucchelli, 1988), and are usually associated with lesions that  
7 encompass premotor and parietal cortices (Haaland, Harrington & Knight, 2000). While  
8 this asymmetry may be linked to hand dominance (Ochipa, Rothi & Heilman, 1989),  
9 functional imagining studies with relatively large sample sizes have shown that  
10 handedness only influences the strength of the left hemisphere bias for skilled  
11 movement but does not produce a reversal in left handers (Vingerhoets et al., 2012;  
12 Verstynen et al., 2005, Chettouf et al., 2020, Vingerhoets et al., 2013). Of the six  
13 patients tested in the current study, five are right-handed and the remaining patient  
14 reported being ambidextrous with a slight preference for using the left hand. We note  
15 that the results from this patient (L3) did not qualitatively differ from the other two left  
16 hemisphere patients.

17 Ipsilateral encoding was most prominent in the premotor and parietal cortex of  
18 the left hemisphere, overlapping with the neural regions implicated in praxis. However,  
19 two features of our results do not map on readily to an interpretation that focuses on  
20 hemispheric asymmetries in praxis. First, our task involved simple reaching movements,  
21 whereas praxis generally encompasses more complex learned movements associated  
22 with tool use or symbolic gestures. Second, ipsilateral encoding became more  
23 pronounced during movement execution; a priori, one might have expected this  
24 asymmetry to be more related to gestural intent and thus be more prevalent during  
25 movement planning.

26 An alternative hypothesis is that the ipsilateral activation is reflective of a  
27 prominent role of the left hemisphere in bimanual coordination. The encoding of  
28 ipsilateral arm movement might be a form of state representation, a means to keep  
29 track of the state of the ipsilateral arm given that many actions require the coordinated  
30 activity of the two limbs. This hypothesis, derived from the current data, is consistent  
31 with the increased ipsilateral encoding during the movement phase. The need to  
32 monitor the state of the other limb should hold for unimanual gestures performed with  
33 either limb. There is evidence in the neuropsychological literature pointing to a role of  
34 the left hemisphere in bimanual coordination in neuroimaging (Jäncke et al., 2000;  
35 Toyokura, Muro, Komiya & Obara, 1999; Maki, Wong, Sugiura, Ozaki & Sadato, 2008)  
36 and electrophysiological studies (Serrien, Cassidy & Brown, 2003). For example,  
37 Schaffer et al., (2020) observed greater impairments in bimanual coordination following  
38 left hemisphere stroke compared to right hemisphere stroke. Interestingly, the  
39 impairment was manifest prior to peak velocity, a finding interpreted as a disruption in  
40 predictive control. It may be that the left hemisphere makes an asymmetric contribution  
41 to inter-limb coordination by tracking or predicting where both limbs are in space.

42 An important question for future work is to examine how ipsilateral  
43 representations in the left hemisphere are affected during more complex movements,  
44 including those that involve both limbs. Using fMRI, Diedrichsen, Wiestler and Krakauer  
45 (2013) compared ipsilateral movement representations during unimanual and bimanual  
46 movements. Within the primary motor cortex, ipsilateral representations could only be  
47 discerned during unimanual movement. However, caudal premotor and anterior parietal  
48 regions retained similar ipsilateral representation during uni- and bimanual movement.

1 If the left hemisphere tracks both limbs to facilitate bimanual coordination, we would  
2 predict that ipsilateral representations in premotor cortex are retained more strongly in  
3 the left hemisphere compared to the right hemisphere when both arms are engaged in  
4 the task.

5 **Conclusion:** Using a kinematic encoding model, we observed a striking hemispheric  
6 asymmetry, with the left hemisphere more strongly encoding the ipsilateral arm than the  
7 right hemisphere, a finding that was apparent during preparation and amplified during  
8 movement. This asymmetry was primarily driven by electrodes positioned over premotor  
9 and parietal cortices, with strong contralateral encoding for electrodes positioned over  
10 sensorimotor cortex. One possible interpretation of our results is that these networks  
11 monitor the state of each arm, a prerequisite for most skilled actions.

## 12 **METHOD**

13 **Participants.** Intracranial recordings were obtained from six patients (2 female; 5 right-  
14 handed) implanted with subdural grids as part of their treatment for intractable epilepsy.  
15 Data were recorded at three hospitals: University of California, Irvine (UCI) Medical  
16 Center (n = 2), University of California, San Francisco (UCSF) Medical Center (n = 2)  
17 and California Pacific Medical Center (CPMC), San Francisco (n = 2). Electrode  
18 placement was solely determined based on clinical considerations and all procedures  
19 were approved by the institutional review boards at the hospitals, as well as the  
20 University of California, Berkeley. All patients provided informed consent prior to  
21 participating in the study.

22 **Behavioral task.** Patients performed an instructed-delay reaching task while sitting  
23 upright in their hospital bed. The patient rested their arms on a horizontal platform (71  
24 cm x 20 cm) that was placed over a standard hospital overbed table. The platform  
25 contained two custom-made buttons, each connected to a microswitch. At the far end of  
26 the platform (13 cm from the buttons, approximately 55 cm from the patient's eyes), a  
27 touchscreen monitor was attached, oriented vertically. Visual targets could appear at  
28 one of six locations, four for each arm (Figure 1a). The two central locations were used  
29 as targets for reaches with either arm; the two eccentric targets varied depending on the  
30 arm used. Stimulus presentation was controlled with Matlab 2016a. A photodiode  
31 sensor was placed on the monitor to precisely track target presentation times. The  
32 analog signals from the photodiode and the two microswitches were fed into the ECoG  
33 recording system and were digitized into the same data file as the ECoG data with  
34 identical sampling frequency.

35 Testing of the contralateral and ipsilateral arms (relative to the ECoG electrodes)  
36 was conducted in separate experimental blocks that were counterbalanced. To start  
37 each trial, the patient placed their left and right index fingers on two custom buttons to  
38 depress the microswitches (this indicated they were in the correct position and ready to  
39 start the trial). If both microswitches remained depressed for 500 ms, a fixation stimulus  
40 was presented in the middle of the screen for 750 ms, followed by the target, a circle  
41 (1.25 cm diameter) which appeared in one of the four locations. Another hold period of  
42 900 ms followed in which the participant was instructed to prepare the required  
43 movement while the target remained on the screen. If the microswitch was actuated  
44 during this hold period, an error message appeared on the screen and the program  
45 would advance to the next trial. If the start position was maintained, a compound  
46 imperative stimulus was presented at the end of the hold period. This consisted of an



1 auditory tone and an increase in the size of the target (2.5 cm diameter). The participant  
2 was instructed that this was the signal to initiate and complete a continuous out-and-  
3 back movement, attempting to touch the screen at the target location before returning  
4 back to the platform. The target disappeared when the touchscreen was contacted. The  
5 imperative was withheld on 5% of the trials ('catch' trials) to ensure that the participant  
6 only responded after the onset of the imperative.

7 Once back at the home position, the screen displayed the word 'HIT' or 'MISS'  
8 for 750 ms to indicate if the touch had occurred within the target zone. The target zone  
9 included the 2.5 diameter circle as well as a 1cm buffer around the target. After the  
10 feedback interval, the screen was blank for 250 ms before the reappearance of the  
11 fixation stimulus, signaling the start of the next trial. The patients were informed to  
12 release either of the buttons at any time they wished to take a break.

13 Each block consisted of 40 trials (10/target), all performed with a single limb.  
14 Blocks alternated between contra- and ipsilateral arms (relative to the ECoG  
15 electrodes), with the order counterbalanced across patients. Each block took  
16 approximately 5-6 minutes to complete. All patients completed at least two blocks with  
17 each per arm (Table 1).

18 **Movement analysis and trajectory reconstruction.** We used two methods to analyze  
19 the movements. For the first method, we recorded key events defined by the release of  
20 the microswitch at the start position, time and location of contact with the touchscreen,  
21 and return time to the home position, defined by the time at which they depressed the  
22 home position microswitch. For the second method, we used the Leap Motion 3-d  
23 movement analysis system (Weichert, et al., 2013) to record continuous hand position  
24 and the full movement trajectory (sampling rate = 60 Hz). Although the Leap system is a  
25 lightweight video-based tracking device that is highly mobile, the unpredictable  
26 environment of the ICU led to erratic recordings from the Leap system. For example,  
27 patients frequently had intravenous lines in one or both hands which obstructed the  
28 visibility of the hand and interfered with the ability of the Leap system to track the hand  
29 using their built-in hand model. This resulted in lost samples and therefore satisfactory  
30 kinematic data was obtained from only a subset of conditions collected from patients  
31 using the Leap system.

32 Given the limitations with the Leap data, we opted to use a simple algorithm to  
33 reconstruct the time-resolved hand trajectory in each trial, estimating it from the event-  
34 based data obtained with the first method. We used a beta distribution to estimate the  
35 velocity profile of the forward and return reach based on reach times and the travel  
36 distance (sampling rate = 100 Hz). We opted to use a beta distribution because this  
37 best matched the velocity profiles of the data obtained with the Leap system.

38 For conditions that had clean kinematic traces (no lost samples) from the Leap  
39 system, we compared the estimated kinematic profiles with those obtained with the  
40 Leap system. There was a high correlation between the two data sets ( $r = .98$  for  
41 position in the Z dimension;  $r = .93$  for velocity in the Z dimension; Fig S1). We note that  
42 our method of estimating the trajectories results in a smoothed version of the  
43 movement, one lacking any secondary or corrective movements that are sometimes  
44 observed when reaching to a visual target (Suway & Schwartz, 2019). We believe this is  
45 still a reasonable estimation given the high correlation with the continuous Leap data,  
46 and the fact that participants had ample time to prepare the movements and were

1 instructed and observed to make ballistic movements by the experimenter who was  
2 present for all recording sessions (CMM).

3 **Electrode Localization.** Grid and strip electrode spacing was 1 cm in four patients and  
4 4 mm in the two other patients. The electrode locations were visualized on a three-  
5 dimensional reconstruction of the patient's cortical surface using a custom script that  
6 takes the post-operative computer tomography (CT) scan and co-registers it to the pre-  
7 operative structural magnetic resonance (MR) scan (Stolk et al., 2018).

8 **Neural data acquisition and preprocessing.** Intracranial EEG data and peripheral  
9 data (photodiode and microswitch traces) were acquired using a Nihon Kohden  
10 recording system at UCI (128 channel, 5000 Hz digitization) and CPMC (128 channel,  
11 1000 Hz digitization rate), and two Tucker Davis Technologies recording systems at  
12 UCSF (128 channel, 3052 Hz digitization rate).

13 Offline preprocessing included the following steps. First, if the patient's data was  
14 not sampled at 1000 Hz (UCI and UCSF recording sites), the signal from each electrode  
15 was low-pass filtered at 500 Hz using a Butterworth filter as an anti-aliasing measure  
16 before down-sampling to 1000 Hz. Electrodes were referenced using a common  
17 average reference. Each electrode was notch-filtered at 60, 120 and 180 Hz to remove  
18 line noise. The signals were then visually inspected and electrodes with sustained  
19 excessive noise were excluded from further analyses. The signals were also inspected  
20 by a neurologist (RTK) for epileptic activity and other artifacts. Electrodes that had  
21 pathological seizure activity were also excluded from the main analyses. Out of 752  
22 electrodes, 82 were removed due to excessive noise and 5 were removed due to  
23 epileptic activity, resulting in a final data set of 665 electrodes. Catch trials and  
24 unsuccessful reaches were not included in the analyses.

25 From the cleaned data set, we extracted the HFA instantaneous amplitude using  
26 a Hilbert transform. To account for the  $1/f$  power drop in the spectrum, we divided the  
27 broadband signal into five narrower bands that logarithmically increased from 70 to 200  
28 Hz (i.e., 70-86, 86-107, 107-131, 131-162, 162-200 Hz), and applied a band-pass filter  
29 within each of these ranges. We then took the absolute value of the Hilbert transform  
30 within each band-pass, performed a z-score transformation, and averaged the five  
31 values. Z-scoring was performed after concatenating all the blocks for each patient,  
32 ensuring that we did not obscure possible amplitude differences across the two arms.  
33 As a final step, the data were down-sampled to 100 Hz to reduce computational load  
34 (e.g., number of parameters in the encoding model, see below). HFA amplitude  
35 fluctuations (envelope; are evident at lower frequencies (Canolty et al., 2006; Pei et al.,  
36 2011).

37 **Feature selection.** Four estimated kinematic features were used to predict HFA (Figure  
38 1B *left*). The first two features were position and speed in the Z dimension. This  
39 dimension captures variability related to movement that is relatively independent of  
40 target location (i.e., along the axis between the patient and touchscreen). The second  
41 pair of features were spherical angles that define the specific target locations (Figure 1A  
42 *right*). Features were selected to reduce collinearity and redundancy in the encoding  
43 model. Because we include time lags for each kinematic feature, derivatives can  
44 emerge from the linear model (e.g., velocity and acceleration can be created from  
45 position); thus, velocity and acceleration were not included as additional features.  
46 Speed is a non-linear transformation of position and is added as a separate feature.

1 **Kinematic encoding model.** The estimated kinematic features were used to predict the  
2 HFA for each electrode (Fig 1F). We created a 4 x 400 feature matrix by generating a  
3 time series for each feature by time-lagging the values of the selected feature relative to  
4 the neural data, with lags extending from 2 s before movement onset to 2 s after  
5 movement onset (sampling rate at 100 Hz). This wide range of lags serves two  
6 purposes. First, it provides a way to compensate for the anticipated asynchrony  
7 between neural data and movement kinematics. Second, it allowed us to evaluate HFA  
8 activity during the instructed delay (beginning ~1.5 s before movement onset) period as  
9 well as during movement. HFA at each time point [HFA(t)] was modeled as a weighted  
10 linear combination of the kinematic features at different time-lags, resulting in a set of  
11 beta weights,  $b_1 \dots, b_{400}$  per kinematic feature. To make the beta weights scale-free,  
12 the kinematic features and neural HFA were z-scored before being fit by the model.

13 **Model fitting.** Regularized (ridge) regression (Hoerl and Kennard, 1970) was used to  
14 estimate the weights that map each kinematic feature (X) to the HFA signal (y) for each  
15 electrode, with  $\lambda$  being the regularization hyperparameter:

$$16 \quad \hat{\beta} = (X^T X + \lambda I)^{-1} X^T y$$

17 For within-arm model fitting, the total dataset consisted of all clean, successful trials  
18 performed with either the ipsilateral or contralateral arm (each arm was fit separately).  
19 Nested five-fold cross-validation was used to select the regularization hyperparameter  
20 on inner test sets (validation sets) and assess prediction performance on separate,  
21 outer test sets. At the outer level, the data was partitioned into five mutually exclusive  
22 estimation and test sets. For each test set, the remaining data served as the estimation  
23 set. For each outer fold, we further partitioned our estimation set into five mutually  
24 exclusive inner folds to train the model (80% of estimation set) and predict neural  
25 responses across a range of regularization values on the validation set (20% of  
26 estimation set). For each inner fold, the regularization parameter value was selected  
27 that produced the best prediction as measured by the linear correlation of the predicted  
28 and actual HFA. The average of the selected regularization parameters across the five  
29 inner folds was computed and used to calculate the prediction of the HFA on the outer  
30 test set. This procedure was done at the outer level five times. Our primary measure is  
31 held-out prediction performance ( $R^2$ ), which we quantified as the squared linear  
32 correlation between the model prediction and the actual HFA time series, averaged  
33 across the five mutually exclusive test sets.

34 To be considered as predictive, we established a criterion that an electrode must  
35 account for at least 5% of the variability in the HFA signal ( $R^2 > .05$ ) for either ipsilateral  
36 or contralateral reaches (Downey et al., 2020). Electrodes not meeting this criterion were  
37 not included in subsequent analyses.

38 For across-arm model fitting, the same procedure was used except the test set  
39 was partitioned from the total dataset of the other arm. We partitioned the data in this  
40 manner (80% estimation, 20% test) to make the fitting procedure for the across-arm  
41 model comparable to that employed in the within-arm model.

42 **Tuning modulation and similarity across arms.** Modulation depth of target tuning  
43 was calculated as the standard deviation of the mean HFA predictions for each of the  
44 four target locations:

$$MD = \sum_{i=1}^n \frac{(x_i - \bar{x}_i)^2}{n}$$

To assess similarity in tuning across the two arms, we computed, for each electrode, the SSE (sum of squared errors) for average HFA predictions to the same target between the contralateral and ipsilateral arms.

$$SSE_e = \sum_{i=1}^n (\{contra_i - ipsi_i\})^2$$

This metric was only calculated for the two central targets, the targets common to both arms (the two eccentric target locations varied depending on the arm used). These values were scaled from 0 to 1 based on the minimum and maximum values of SSE across all electrodes. SSE represents a metric of dissimilarity; To calculate a similarity index (SI), we converted this to a measure of similarity by subtracting the scaled SSE values from 1:

$$SI = 1 - \frac{SSE_e - \min(SSE_e)}{\max(SSE_e) - (SSE_e)}$$

Thus, higher SI represents more similar average predictions.

**Separating instruction and movement phases.** The encoding model was run to predict the full HFA time course. To compare model prediction performance during different phases of the task, the data were epoched into instruction and movement phases, using event markers recorded in the analog channel (i.e., cue onset and movement onset). Epochs of the same task phase were concatenated together, and prediction performance was operationalized as the square of the Pearson correlation between the predicted and actual HFA for each task phase.

**Permutation testing.** A permutation-based analysis-of-variance (pbANOVA) was used to assess differences in distributions for the different experimental conditions. pbANOVA is preferable for experimental designs that involve orthogonal manipulation of fixed factors in which the measured variable does not conform to the distributional assumptions necessary for traditional parametric ANOVA (Anderson & Braak, 2003). In this analysis, null distributions for the main effect of each factor and interaction are created using 10000 surrogate datasets, in each of which the data of a random subset of participants is permuted. In each iteration, the surrogate data is analyzed using a standard ANOVA and the F value of the relevant effect is registered. The effect in the original data is considered significant only if the F value of a standard ANOVA of this effect is larger than 95% of the values in the null distribution. For main effects, the permutations are conducted such that the raw values of the factor of interest are permuted within the levels of the other factor ('restricted' permuting). For the interaction effect, the permutations are not conducted on the raw data but on a dataset that is generated by subtracting the contribution of the main effects from the raw data (see, Anderson & Braak, 2003). The resulting dataset ('reduced' dataset) includes only the interaction terms and their random errors. On this reduced dataset the permutations are conducted without being limited to levels of specific factors ('unrestricted' permutations).

1 **Calculating distance from dorsal central sulcus.** For each patient, 30 discrete (x, y)  
2 coordinates were manually demarcated along the central sulcus on individual MRI  
3 scans. The 30 points were then interpolated to create a line traversing the central sulcus  
4 for each individual. The dorsal aspect of the central sulcus was defined as all points  
5 dorsal to the midpoint of the central sulcus. We then calculated the absolute distance  
6 between each electrode and the closest point on the dorsal aspect of the central sulcus  
7 (our interpolated line).

## 8 **ACKNOWLEDGMENTS:**

9  
10 We want to thank Anwar Nunez-Elizalde for his invaluable guidance building the  
11 encoding model, Ian Greenhouse for building the first prototype rig to bring into the ICU  
12 and William Liberti for his advice with the figures. This research was supported by the  
13 National Institute of Health: NS097480.

## 14 **AUTHOR CONTRIBUTIONS:**

15 Conceptualization, C.M.M., T.C.D., A.B., J.M.C., R.T.K. and R.B.I.; Methodology,  
16 C.M.M., J.M.C., R.B.I.; Software, C.M.M.; Investigation, C.M.M.; Resources, J.J.L.,  
17 E.F.C., D.K-S., K.D.L., and P.B.W.; Writing – Original Draft, C.M.M.; Writing – Review &  
18 Editing, T.C.D., A.B., R.T.K., and R.B.I.; Visualization, C.M.M.; Supervision, J.M.C.,  
19 R.T.K., and R.B.I.; Funding Acquisition, J.M.C., R.T.K., and R.B.I.

20  
21 **DECLARATION OF INTEREST:** The authors declare no competing interests.  
22  
23  
24  
25  
26  
27  
28  
29  
30  
31  
32  
33  
34  
35  
36  
37

## 1 **References:**

- 2 Nyberg-Hansen, R., & Rinvik, E. (1963). Some comments on the pyramidal tract, with  
3 special reference to its individual variations in man. *Acta Neurologica*  
4 *Scandinavica*, 39(1), 1-30.
- 5 Bourbonnais, D., & Noven, S. V. (1989). Weakness in patients with  
6 hemiparesis. *American Journal of Occupational Therapy*, 43(5), 313-319.
- 7 Babiloni, C., Carducci, F., Cincotti, F., Rossini, P. M., Neuper, C., Pfurtscheller, G., &  
8 Babiloni, F. (1999). Human movement-related potentials vs desynchronization of EEG  
9 alpha rhythm: a high-resolution EEG study. *Neuroimage*, 10(6), 658-665.
- 10 Ghacibeh, G. A., Mirpuri, R., Drago, V., Jeong, Y., Heilman, K. M., & Triggs, W. J.  
11 (2007). Ipsilateral motor activation during unimanual and bimanual motor tasks. *Clinical*  
12 *Neurophysiology*, 118(2), 325-332.
- 13 Ganguly, K., Secundo, L., Ranade, G., Orsborn, A., Chang, E. F., Dimitrov, D. F., ... &  
14 Carmena, J. M. (2009). Cortical representation of ipsilateral arm movements in monkey  
15 and man. *Journal of Neuroscience*, 29(41), 12948-12956.
- 16 Ames, K. C., & Churchland, M. M. (2019). Motor cortex signals for each arm are mixed  
17 across hemispheres and neurons yet partitioned within the population  
18 response. *Elife*, 8, e46159.
- 19 Bundy, D. T., Szrama, N., Pahwa, M., & Leuthardt, E. C. (2018). Unilateral, 3D arm  
20 movement kinematics are encoded in ipsilateral human cortex. *Journal of*  
21 *Neuroscience*, 38(47), 10042-10056.
- 22 Wisneski, K. J., Anderson, N., Schalk, G., Smyth, M., Moran, D., & Leuthardt, E. C.  
23 (2008). Unique cortical physiology associated with ipsilateral hand movements and  
24 neuroprosthetic implications. *Stroke*, 39(12), 3351-3359.
- 25 Cisek, P., Crammond, D. J., & Kalaska, J. F. (2003). Neural activity in primary motor  
26 and dorsal premotor cortex in reaching tasks with the contralateral versus ipsilateral  
27 arm. *Journal of Neurophysiology*, 89(2), 922-942.
- 28 Steinberg, O., Donchin, O., Gribova, A., De Oliveira, S. C., Bergman, H., & Vaadia, E.  
29 (2002). Neuronal populations in primary motor cortex encode bimanual arm  
30 movements. *European Journal of Neuroscience*, 15(8), 1371-1380.
- 31 Willett, F. R., Deo, D. R., Avansino, D. T., Rezaii, P., Hochberg, L. R., Henderson, J. M.,  
32 & Shenoy, K. V. (2020). Hand knob area of premotor cortex represents the whole body  
33 in a compositional way. *Cell*, 181(2), 396-409.
- 34
- 35 Heming, E. A., Cross, K. P., Takei, T., Cook, D. J., & Scott, S. H. (2019). Independent  
36 representations of ipsilateral and contralateral limbs in primary motor cortex. *ELife*, 8,  
37 e48190.

- 1 Downey, J. E., Quick, K. M., Schwed, N., Weiss, J. M., Wittenberg, G. F., Boninger, M.  
2 L., & Collinger, J. L. (2020). The motor cortex has independent representations for  
3 ipsilateral and contralateral arm movements but correlated representations for  
4 grasping. *Cerebral Cortex*, 30(10), 5400-5409.
- 5 Corballis, M. C., Badzakova-Trajkov, G., & Häberling, I. S. (2012). Right hand, left brain:  
6 genetic and evolutionary bases of cerebral asymmetries for language and manual  
7 action. *Wiley Interdisciplinary Reviews: Cognitive Science*, 3(1), 1-17.
- 8 Rothi, L. G., Ochipa, C., & Heilman, K. M. (1997). A cognitive neuropsychological model  
9 of limb praxis and apraxia. *Apraxia: The neuropsychology of action*, 29-49.
- 10 Schaefer, S. Y., Haaland, K. Y., & Sainburg, R. L. (2007). Ipsilesional motor deficits  
11 following stroke reflect hemispheric specializations for movement control. *Brain*, 130(8),  
12 2146-2158.
- 13 Liepmann, H. (1908). *Drei aufsätze aus dem apraxiegebiet* (Vol. 2545). S. Karger.
- 14 De Renzi, E., & Lucchelli, F. (1988). Ideational apraxia. *Brain*, 111(5), 1173-1185.
- 15 Haaland, K. Y., Harrington, D. L., & Knight, R. T. (2000). Neural representations of  
16 skilled movement. *Brain*, 123(11), 2306-2313.
- 17 Chettouf, S., Rueda-Delgado, L. M., de Vries, R., Ritter, P., & Daffertshofer, A. (2020).  
18 Are unimanual movements bilateral? *Neuroscience & Biobehavioral Reviews*, 113, 39-  
19 50.
- 20 Verstynen, T., Diedrichsen, J., Albert, N., Aparicio, P., & Ivry, R. B. (2005). Ipsilateral  
21 motor cortex activity during unimanual hand movements relates to task  
22 complexity. *Journal of Neurophysiology*, 93(3), 1209-1222.
- 23 Verstynen, T., & Ivry, R. B. (2011). Network dynamics mediating ipsilateral motor cortex  
24 activity during unimanual actions. *Journal of Cognitive Neuroscience*, 23(9), 2468-2480.
- 25 Schäfer, K., Blankenburg, F., Kupers, R., Grüner, J. M., Law, I., Lauritzen, M., &  
26 Larsson, H. B. (2012). Negative BOLD signal changes in ipsilateral primary  
27 somatosensory cortex are associated with perfusion decreases and behavioral  
28 evidence for functional inhibition. *Neuroimage*, 59(4), 3119-3127.
- 29 Leszczyński, M., Barczak, A., Kajikawa, Y., Ulbert, I., Falchier, A. Y., Tal, I., ... &  
30 Schroeder, C. E. (2020). Dissociation of broadband high-frequency activity and  
31 neuronal firing in the neocortex. *Science Advances*, 6(33), eabb0977.
- 32 Muthukumaraswamy, S. D. (2010). Functional properties of human primary motor cortex  
33 gamma oscillations. *Journal of Neurophysiology*, 104(5), 2873-2885.
- 34 Kriegeskorte, N., & Douglas, P. K. (2019). Interpreting encoding and decoding  
35 models. *Current Opinion in Neurobiology*, 55, 167-179.
- 36 Weichert, F., Bachmann, D., Rudak, B., & Fisseler, D. (2013). Analysis of the accuracy  
37 and robustness of the leap motion controller. *Sensors*, 13(5), 6380-6393.

- 1 Suway, S. B., & Schwartz, A. B. (2019). Activity in Primary Motor Cortex Related to  
2 Visual Feedback. *Cell Reports*, 29(12), 3872-3884.
- 3 Stolk, A., Griffin, S., Van der Meij, R., Dewar, C., Saez, I., Lin, J. J., ... & Oostenveld, R.  
4 (2018). Integrated analysis of anatomical and electrophysiological human intracranial  
5 data. *Nature Protocols*, 13(7), 1699-1723.
- 6 Canolty, R. T., Edwards, E., Dalal, S. S., Soltani, M., Nagarajan, S. S., Kirsch, H. E., ...  
7 & Knight, R. T. (2006). High gamma power is phase-locked to theta oscillations in  
8 human neocortex. *Science*, 313(5793), 1626-1628.
- 9 Pei, X., Leuthardt, E. C., Gaona, C. M., Brunner, P., Wolpaw, J. R., & Schalk, G. (2011).  
10 Spatiotemporal dynamics of electrocorticographic high gamma activity during overt and  
11 covert word repetition. *Neuroimage*, 54(4), 2960-2972
- 12 Hoerl, A. E., & Kennard, R. W. (1970). Ridge regression: Biased estimation for  
13 nonorthogonal problems. *Technometrics*, 12(1), 55-67.
- 14 Anderson, M., & Braak, C. T. (2003). Permutation tests for multi-factorial analysis of  
15 variance. *Journal of statistical computation and simulation*, 73(2), 85-113.
- 16 Churchland, M. M., Cunningham, J. P., Kaufman, M. T., Foster, J. D., Nuyujukian, P.,  
17 Ryu, S. I., & Shenoy, K. V. (2012). Neural population dynamics during  
18 reaching. *Nature*, 487(7405), 51-56.
- 19 Elsayed, G. F., Lara, A. H., Kaufman, M. T., Churchland, M. M., & Cunningham, J. P.  
20 (2016). Reorganization between preparatory and movement population responses in  
21 motor cortex. *Nature Communications*, 7(1), 1-15.
- 22 Schaffer, J. E., & Sainburg, R. L. (2021). Interlimb Responses to Perturbations of  
23 Bilateral Movements are Asymmetric. *Journal of Motor Behavior*, 53(2), 217-233.
- 24 Diedrichsen, J., Wiestler, T., & Krakauer, J. W. (2013). Two distinct ipsilateral cortical  
25 representations for individuated finger movements. *Cerebral Cortex*, 23(6), 1362-1377.
- 26 Przybylski, Ł., & Króliczak, G. (2017). Planning functional grasps of simple tools invokes  
27 the hand-independent praxis representation network: an fMRI study. *Journal of the*  
28 *International Neuropsychological Society*, 23(2), 108-120.
- 29 Buxbaum, L. J., Kyle, K. M., Tang, K., & Detre, J. A. (2006). Neural substrates of  
30 knowledge of hand postures for object grasping and functional object use: Evidence  
31 from fMRI. *Brain Research*, 1117(1), 175-185.
- 32 Xu J, Gannon PJ, Emmorey K, Smith JF, Braun A. Symbolic gestures and spoken  
33 language are processed by a common neural system. *Proc Natl Acad Sci U S A* 2009,  
34 106:20665–20669.
- 35 Bohlhalter, S., Hattori, N., Wheaton, L., Fridman, E., Shamim, E. A., Garraux, G., &  
36 Hallett, M. (2009). Gesture subtype-dependent left lateralization of praxis planning: An  
37 event-related fMRI study. *Cerebral Cortex*, 19(6), 1256-1262.
- 38 Ochipa C, Rothi LJG, Heilman KM (1989): Ideational apraxia—A deficit in tool selection  
39 and use. *Ann Neurol* 25:190–193.



- 1 Vingerhoets, G., Acke, F., Alderweireldt, A. S., Nys, J., Vandemaele, P., & Achten, E.  
2 (2012). Cerebral lateralization of praxis in right-and left-handedness: Same pattern,  
3 different strength. *Human Brain Mapping*, 33(4), 763-777.
- 4 Vingerhoets, G., Alderweireldt, A. S., Vandemaele, P., Cai, Q., Van der Haegen, L.,  
5 Brysbaert, M., & Achten, E. (2013). Praxis and language are linked: evidence from co-  
6 lateralization in individuals with atypical language dominance. *Cortex*, 49(1), 172-183.
- 7 Vingerhoets, G., Acke, F., Alderweireldt, A. S., Nys, J., Vandemaele, P., & Achten, E.  
8 (2012). Cerebral lateralization of praxis in right-and left-handedness: Same pattern,  
9 different strength. *Human Brain Mapping*, 33(4), 763-777.
- 10 Jäncke, L., Peters, M., Himmelbach, M., Nösselt, T., Shah, J., & Steinmetz, H. (2000).  
11 fMRI study of bimanual coordination. *Neuropsychologia*, 38(2), 164-174.
- 12 Toyokura, M., Muro, I., Komiya, T., & Obara, M. (1999). Relation of bimanual  
13 coordination to activation in the sensorimotor cortex and supplementary motor area:  
14 analysis using functional magnetic resonance imaging. *Brain Research Bulletin*, 48(2),  
15 211-217.
- 16 Serrien, D. J., Cassidy, M. J., & Brown, P. (2003). The importance of the dominant  
17 hemisphere in the organization of bimanual movements. *Human Brain Mapping*, 18(4),  
18 296-305.
- 19 Maki, Y., Wong, K. F. K., Sugiura, M., Ozaki, T., & Sadato, N. (2008). Asymmetric  
20 control mechanisms of bimanual coordination: an application of directed connectivity  
21 analysis to kinematic and functional MRI data. *Neuroimage*, 42(4), 1295-1304.

22

23

24
